# Supplementary material for: Synthesis of thyminyl stilbazoles and their photo-reactivity
Source: Royal Society of Chemistry journal article supplement (doi:10.1039/c4pp00185k), 2014-06-26
Supplement: c4pp00185k1.pdf [file c4pp00185k1.pdf]

## Supplementary Information

### Synthesis of ThyminyI Stilbazoles and Their Photo-reactivity

Priscilla Johnston, Yuki Nishikami, and Kei Saito\*

School of Chemistry, Monash University, VIC 3800, Australia

E-mail: kei.saito@monash.edu

#### Photos of crystals before and after the photo reaction

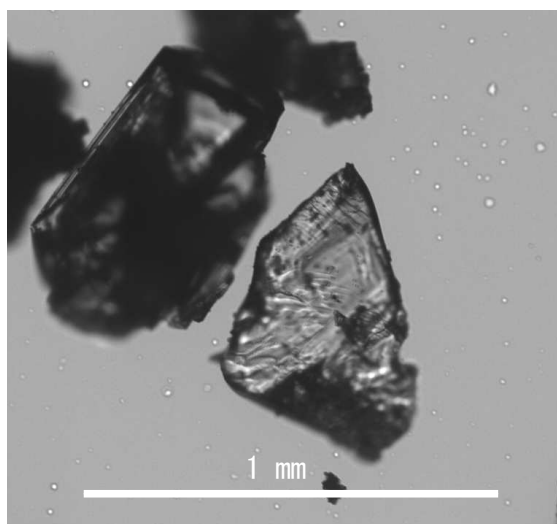

**Figure S1.** Crystals of VBT-4Pyr (**3**) before the irradiation.

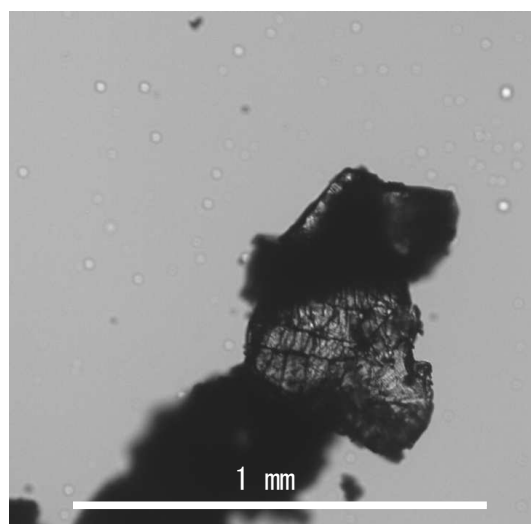

**Figure S2.** Crystals of VBT-4Pyr (**3**) as-irradiated. (Some crystals have moved due to a transfer from a microscope to a light source.)
